# Supplementary material for: SCD4 deficiency decreases cardiac steatosis and prevents cardiac remodeling in mice fed a high-fat diet
Source: PubMed Central journal article supplement (PMC11402454; doi:10.1016/j.jlr.2024.100612), 2024-07-31
Supplement: mmc1.pdf [file mmc1.pdf]

## Supplementary material

**Table S1.** Primer sequences used for RT-qPCR analysis.

| Gene          | Forward primer         | Reverse primer           |
|---------------|------------------------|--------------------------|
| <i>Myh6</i>   | GGCACAGAAACACCTGAAGA   | CATTGGCATGGACAGCATCATC   |
| <i>Myh7</i>   | ATGTGCCGGACCTTGGA      | CCTCGGGTTAGCTGAGAGATCA   |
| <i>Nppb</i>   | TTTGGGCTGTAACGCACTGA   | TTGTGGCAAGTTTGTGCTCC     |
| <i>Nppa</i>   | TGTACAGTGCGGTGTCCAACA  | AGAGCCCTCAGTTTGCTTTTC    |
| <i>Scd1</i>   | TACCGCTGGCACATCAACTTC  | AACAGGAACTCAGAAGCCCAAAGC |
| <i>Scd2</i>   | CACTGGGGAGCAGATGTTCG   | CAAATACGCGAAGAGACAGGTG   |
| <i>Scd4</i>   | GTTCCAGAGGAGGTACTACAAG | GAGACGCATAAGCTGTGTTG     |
| <i>Ndufv2</i> | TGGATGGCTACCTATCTCCGCT | GGTACTTCCCAACTGGCTTTTCG  |
| <i>Rpl32</i>  | AGTTCCTGGTCCACAATGTCA  | GCACACAAGCCATCTACTCATT   |

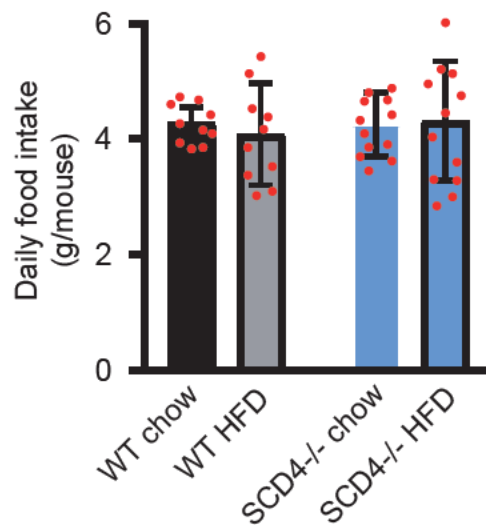

**Fig. S1.** Food intake during the eight weeks of the experiment. The data are expressed as mean  $\pm$  SD, n = 10-12 mice/group.

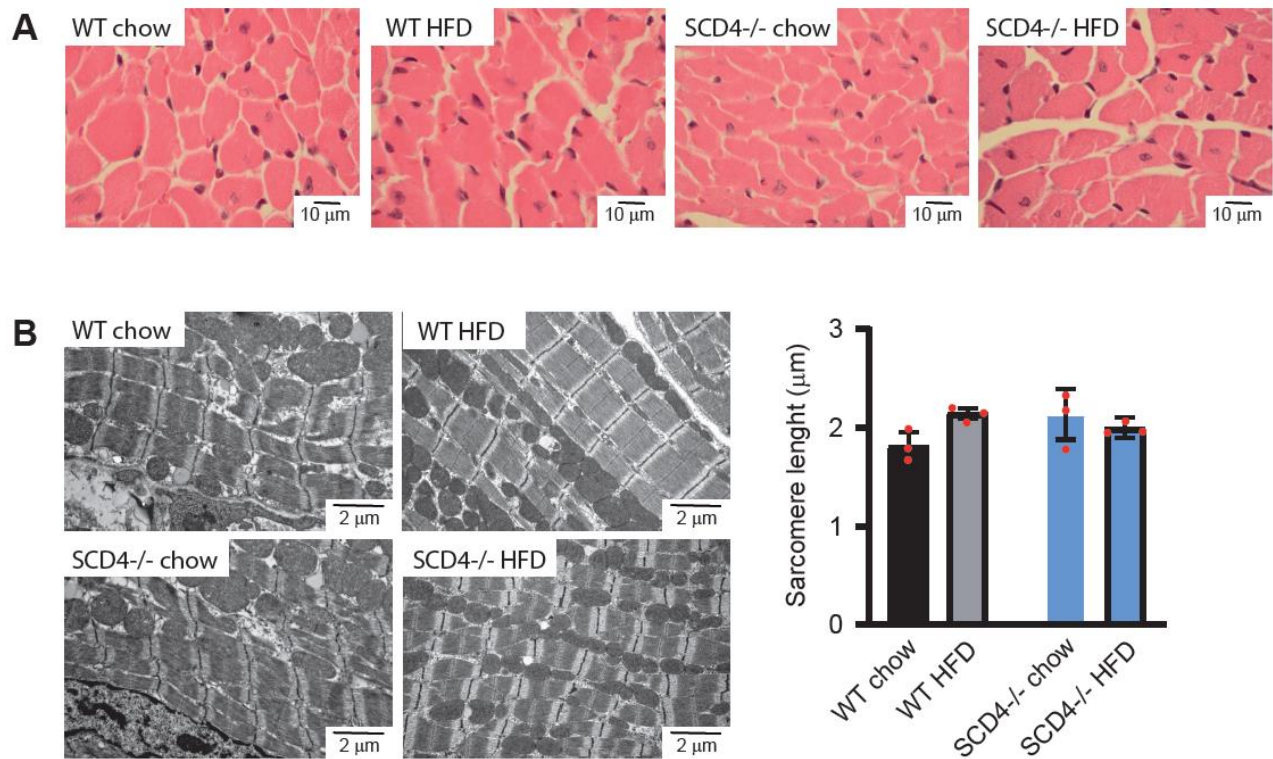

**Fig. S2.** (A) Hematoxylin and eosin staining of mouse left ventricle. Magnification 60 x, scale bar indicates 10 μm. (B) Representative electron microscopy images of left ventricular sarcomeres. Magnification 15,000 x, scale bar indicates 2 μm. Sarcomere length ( $n > 40$ ) was measured at 6,000 x magnification electron microscopy images. The data are expressed as mean  $\pm$  SD,  $n = 3$  mice/group.

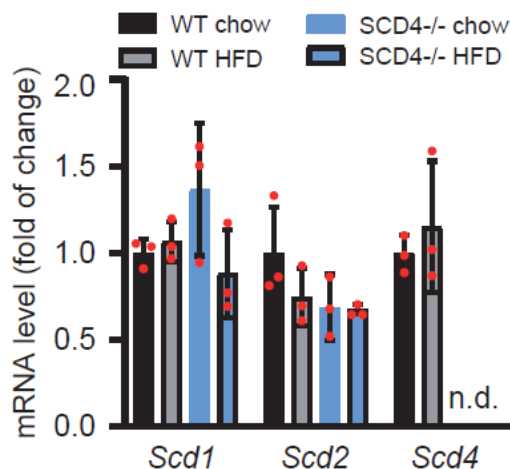

**Fig. S3.** Effect of SCD4 deficiency and HFD on the mRNA levels of individual SCD isoforms expressed in the heart. mRNA level was analyzed using quantitative real-time PCR and  $2^{-\Delta\Delta Ct}$  method. The data are expressed as mean  $\pm$  SD,  $n = 10-12$  mice/group. No significant changes were found.
